# Supplementary material for: Hemodialysis and Plasma Oxylipin Biotransformation in Peripheral Tissue
Source: MDPI journal article supplement (doi:10.3390/metabo12010034), 2022-01-04
Supplement: s1 [file s1]

**Table S1. Clinical parameters of hemodialysis (HD)  
patients (n=12 each)**

| <b>Parameters</b>                   | <b>Patients</b> |
|-------------------------------------|-----------------|
| Glucose ( 60-110 mg/dl)             | 115.8 ± 36.7    |
| Total cholesterol ( < 200<br>mg/dl) | 221.8 ± 181.2   |
| LDL-cholesterol ( < 130<br>mg/dl)   | 101.2 ± 30.7    |
| HDL- cholesterol ( >35<br>mg/dl)    | 42.4 ± 9.9      |
| Triglycerides ( <200<br>mg/dl)      | 151.0 ± 77.4    |

Data are presented as mean + SD

**Table S2. Effects of hemodialysis on total plasma oxylipins in the CKD patients before (Pre-HD) and at cessation (Post-HD) of hemodialysis (n=12 each)**

| Amount ng/ml                      | pre-HD A                          | post-HD A                         | p value, t test<br>(# paired<br>Wilcoxon<br>test) | pre-HD V                          | post-HD V                         | p value, t test<br>(# paired<br>Wilcoxon<br>test) |
|-----------------------------------|-----------------------------------|-----------------------------------|---------------------------------------------------|-----------------------------------|-----------------------------------|---------------------------------------------------|
|                                   | Panel A                           |                                   |                                                   | Panel B                           |                                   |                                                   |
| <b>CYP epoxy-<br/>metabolites</b> |                                   |                                   |                                                   |                                   |                                   |                                                   |
| 5,6-EET                           | <b>25.2403</b><br><b>±22.8032</b> | <b>37.0725</b><br><b>±16.6846</b> | <b>0.042 #</b>                                    | <b>16.8013</b><br><b>±15.3681</b> | <b>61.8386</b><br><b>±21.0905</b> | <b>0.002 #</b>                                    |
| 8,9-EET                           | <b>10.5227</b><br><b>±10.8994</b> | <b>13.3085</b><br><b>±5.6504</b>  | <b>0.042 #</b>                                    | <b>7.2706</b><br><b>±6.6772</b>   | <b>22.3969</b><br><b>±7.8620</b>  | <b>0.002 #</b>                                    |
| 11,12-EET                         | <b>9.9539</b><br><b>±10.0802</b>  | <b>14.2304</b><br><b>±6.6762</b>  | <b>0.036 #</b>                                    | <b>7.0358</b><br><b>±6.8420</b>   | <b>25.6937</b><br><b>±9.1845</b>  | <b>0.002 #</b>                                    |
| 14,15-EET                         | <b>12.5615</b><br><b>±12.5408</b> | <b>19.0872</b><br><b>±9.2999</b>  | <b>0.031 #</b>                                    | <b>9.6655</b><br><b>±9.4944</b>   | <b>35.6871</b><br><b>±13.5842</b> | <b>0.002 #</b>                                    |
| 5,6-DHET                          | 1.1450<br>±0.5549                 | 1.3684<br>±0.5945                 | 0.176 #                                           | <b>1.0727</b><br><b>±0.5911</b>   | <b>1.2782</b><br><b>±0.6163</b>   | <b>0.012 #</b>                                    |
| 8,9-DHET                          | 1.7434<br>±1.5788                 | 1.6086<br>±1.1218                 | 0.902 #                                           | <b>1.6063</b><br><b>±1.3596</b>   | <b>1.2535</b><br><b>±0.9769</b>   | <b>0.012 #</b>                                    |
| 11,12-DHET                        | 0.4366<br>±0.2207                 | 0.5221<br>±0.1967                 | 0.176 #                                           | 0.4188<br>±0.1959                 | 0.4683<br>±0.1888                 | 0.056                                             |
| 14,15-DHET                        | 0.4159<br>±0.0996                 | 0.4919<br>±0.1251                 | 0.124                                             | 0.3721<br>±0.0788                 | 0.4212<br>±0.1045                 | 0.07                                              |
| 7,8-EDP                           | 4.5236<br>±4.3719                 | 6.0064<br>±2.6897                 | 0.097 #                                           | <b>3.2930</b><br><b>±3.1818</b>   | <b>10.4413</b><br><b>±3.5636</b>  | <b>0.002 #</b>                                    |
| 10,11-EDP                         | 4.4784<br>±4.4009                 | 6.6357<br>±3.0803                 | 0.056 #                                           | <b>3.3370</b><br><b>±3.0863</b>   | <b>11.9332</b><br><b>±3.9274</b>  | <b>0.002 #</b>                                    |
| 13,14-EDP                         | 3.3860<br>±3.4990                 | 4.8226<br>±2.2061                 | 0.097 #                                           | <b>2.6621</b><br><b>±2.8208</b>   | <b>7.8177</b><br><b>±2.6177</b>   | <b>0.002 #</b>                                    |
| 16,17-EDP                         | 2.9692<br>±2.8814                 | 3.8342<br>±1.6915                 | 0.085 #                                           | <b>2.1926</b><br><b>±2.0367</b>   | <b>5.5352</b><br><b>±2.0151</b>   | <b>0.002 #</b>                                    |
| 19,20-EDP                         | 5.5558<br>±5.3859                 | 8.6761<br>±3.8647                 | 0.056 #                                           | <b>3.9685</b><br><b>±3.1487</b>   | <b>16.3124</b><br><b>±6.2669</b>  | <b>0.002 #</b>                                    |
| 7,8-DiHDPA                        | 0.4489<br>±0.2473                 | 0.4905<br>±0.2287                 | 0.58 #                                            | 0.4110<br>±0.2301                 | 0.4461<br>±0.2152                 | 0.158 #                                           |
| 10,11-DiHDPA                      | 0.1277<br>±0.0387                 | 0.1439<br>±0.0452                 | 0.371                                             | 0.1210<br>±0.0346                 | 0.1291<br>±0.0539                 | 0.475                                             |
| 13,14-DiHDPA                      | 0.0892<br>±0.0274                 | 0.0989<br>±0.0354                 | 0.473                                             | 0.0846<br>±0.0203                 | 0.1040<br>±0.0439                 | 0.054                                             |
| 16,17-DiHDPA                      | 0.0926<br>±0.0361                 | 0.1160<br>±0.0464                 | 0.195                                             | 0.0947<br>±0.0314                 | 0.1042<br>±0.0480                 | 0.313                                             |
| 19,20-DiHDPA                      | 0.8379<br>±0.4051                 | 0.9534<br>±0.4118                 | 0.506                                             | 0.8262<br>±0.3658                 | 0.9134<br>±0.4345                 | 0.25                                              |
| 5,6-EEQ                           | 0.0051 ±<br>0.0039                | 0.0084 ±<br>0.0052                | 0.069 #                                           | <b>0.0034 ±</b><br><b>0.0026</b>  | <b>0.0148 ±</b><br><b>0.0050</b>  | <b>0.002 #</b>                                    |
| 8,9-EEQ                           | <b>1.4478</b><br><b>±1.2289</b>   | <b>2.6063</b><br><b>±1.7732</b>   | <b>0.036 #</b>                                    | <b>0.9972</b><br><b>±0.6972</b>   | <b>4.3902</b><br><b>±1.5836</b>   | <b>&lt;0,001</b>                                  |
| 11,12-EEQ                         | <b>0.9541</b><br><b>±0.8310</b>   | <b>1.8077</b><br><b>±1.2340</b>   | <b>0.042 #</b>                                    | <b>0.7197</b><br><b>±0.4820</b>   | <b>3.4951</b><br><b>±1.3735</b>   | <b>0.002 #</b>                                    |

|              |                                   |                                   |                |                                   |                                   |                  |
|--------------|-----------------------------------|-----------------------------------|----------------|-----------------------------------|-----------------------------------|------------------|
| 14,15-EEQ    | 0.9436<br>±0.7146                 | 1.7544<br>±1.2152                 | 0.065 #        | <b>0.7047</b><br><b>±0.4467</b>   | <b>3.2728</b><br><b>±1.3192</b>   | <b>0.002 #</b>   |
| 17,18-EEQ    | 1.6849<br>±1.3879                 | 2.9621<br>±2.1045                 | 0.085 #        | <b>1.3915</b><br><b>±0.8490</b>   | <b>6.2605</b><br><b>±2.2755</b>   | <b>0.002 #</b>   |
| 5,6-DiHETE   | 1.5299<br>±0.9299                 | 2.0357<br>±1.4971                 | 0.356 #        | <b>1.3695</b><br><b>±0.7134</b>   | <b>1.6895</b><br><b>±0.8335</b>   | <b>&lt;0,001</b> |
| 8,9-DiHETE   | 0.0908<br>±0.0378                 | 0.1085<br>±0.0552                 | 0.389 #        | 0.0908<br>±0.0317                 | 0.0960<br>±0.0386                 | 0.376            |
| 11,12-DiHETE | 0.0476<br>±0.0379                 | 0.0596<br>±0.0600                 | 0.255 #        | 0.0356<br>±0.0100                 | 0.0372<br>±0.0119                 | 0.451            |
| 14,15-DiHETE | 0.0528<br>±0.0201                 | 0.0538<br>±0.0249                 | 0.916          | 0.0462<br>±0.0135                 | 0.0487<br>±0.0203                 | 0.458            |
| 17,18-DiHETE | 0.2149<br>±0.0825                 | 0.2784<br>±0.1176                 | 0.152          | 0.2141<br>±0.0836                 | 0.2454<br>±0.1082                 | 0.129            |
| 9,10-EpOME   | <b>33.0227</b><br><b>±31.0831</b> | <b>51.7226</b><br><b>±18.8433</b> | <b>0.023 #</b> | <b>22.5987</b><br><b>±12.9602</b> | <b>93.5874</b><br><b>±36.4954</b> | <b>0.002 #</b>   |
| 12,13-EpOME  | <b>30.9825</b><br><b>±26.7698</b> | <b>46.9109</b><br><b>±15.0402</b> | <b>0.023 #</b> | <b>20.7024</b><br><b>±11.0768</b> | <b>79.7224</b><br><b>±23.6841</b> | <b>0.002 #</b>   |
| 9,10-DiHOME  | 4.1455<br>±1.7899                 | 5.5991<br>±2.7877                 | 0.176 #        | <b>3.2993</b><br><b>±1.7108</b>   | <b>5.6467</b><br><b>±2.4652</b>   | <b>0.006 #</b>   |
| 12,13-DiHOME | 4.9809<br>±1.9437                 | 6.9594<br>±3.7873                 | 0.135          | <b>3.8968</b><br><b>±1.6289</b>   | <b>6.9340</b><br><b>±3.3774</b>   | <b>0.01 #</b>    |

#### LOX metabolites

|         |                    |                    |         |                                 |                                  |                |
|---------|--------------------|--------------------|---------|---------------------------------|----------------------------------|----------------|
| 5-HETE  | 10.1945<br>±2.9568 | 11.6499<br>±3.0694 | 0.261   | <b>8.9008</b><br><b>±2.5521</b> | <b>11.2376</b><br><b>±3.5321</b> | <b>0.01 #</b>  |
| 8-HETE  | 3.1627<br>±0.8646  | 3.5068<br>±1.3221  | 0.806 # | 2.9701<br>±0.9371               | 2.9656<br>±1.1078                | 0.985          |
| 9-HETE  | 6.2378<br>±2.4916  | 6.6115<br>±2.5626  | 0.58 #  | 5.0812<br>±2.0444               | 5.7522<br>±2.1829                | 0.158 #        |
| 11-HETE | 4.3689<br>±1.3795  | 4.5454<br>±1.4621  | 0.622 # | 3.4094<br>±1.1668               | 4.0433<br>±1.4575                | 0.084 #        |
| 12-HETE | 5.1343<br>±1.7200  | 6.0063<br>±2.3467  | 0.325   | <b>5.8545</b><br><b>±2.6463</b> | <b>4.7972</b><br><b>±2.3597</b>  | <b>0.023 #</b> |
| 15-HETE | 6.1984<br>±1.9171  | 6.1869<br>±1.8919  | 0.758 # | 4.9051<br>±1.5388               | 5.7417<br>±3.2394                | 0.48 #         |
| 4-HDHA  | 2.3149<br>±0.6472  | 2.4431<br>±0.9794  | 0.902 # | 2.1630<br>±0.5977               | 2.5609<br>±1.2943                | 0.388 #        |
| 7-HDHA  | 2.1060<br>±0.6072  | 2.1783<br>±0.8143  | 0.951 # | 1.7319<br>±0.5209               | 2.0061<br>±0.6765                | 0.137          |
| 8-HDHA  | 1.2263<br>±0.4487  | 1.2990<br>±0.5943  | 0.975 # | 1.0900<br>±0.3821               | 1.1141<br>±0.4935                | 0.875 #        |
| 10-HDHA | 0.7721<br>±0.2512  | 0.7940<br>±0.3187  | 0.857   | 0.6877<br>±0.2059               | 0.7020<br>±0.2701                | 0.801          |
| 11-HDHA | 1.0995<br>±0.3769  | 1.0862<br>±0.4291  | 0.758 # | 1.0493<br>±0.3586               | 1.0103<br>±0.3687                | 0.48 #         |
| 13-HDHA | 0.9168<br>±0.2861  | 0.9169<br>±0.3765  | 0.622 # | 0.8168<br>±0.2303               | 0.8015<br>±0.3238                | 0.855          |
| 14-HDHA | 1.1312<br>±0.4384  | 1.1712<br>±0.5441  | 0.849   | 1.0678<br>±0.4203               | 0.9981<br>±0.5062                | 0.158 #        |
| 16-HDHA | 1.1430<br>±0.3468  | 1.1459<br>±0.4227  | 0.986   | 0.9559<br>±0.3037               | 1.0653<br>±0.4675                | 0.48 #         |
| 17-HDHA | 1.4069<br>±0.4032  | 1.4601<br>±0.5780  | 0.802   | 1.1633<br>±0.3601               | 1.2773<br>±0.5100                | 0.308 #        |

|                            |                                  |                                   |                |                                  |                                   |                |
|----------------------------|----------------------------------|-----------------------------------|----------------|----------------------------------|-----------------------------------|----------------|
| 20-HDHA                    | 2.8698<br>±0.7707                | 2.9700<br>±0.9600                 | 0.786          | 2.4726<br>±0.7079                | 2.7939<br>±1.1603                 | 0.239 #        |
| 5-HEPE                     | 1.4608<br>±0.5576                | 1.5968<br>±0.9534                 | 0.902 #        | 1.3111<br>±0.4406                | 1.4799<br>±0.6337                 | 0.114          |
| 8-HEPE                     | 0.2118<br>±0.0669                | 0.2061<br>±0.1012                 | 0.498 #        | 0.1959<br>±0.0421                | 0.1817<br>±0.0752                 | 0.358          |
| 9-HEPE                     | 0.4018<br>±0.1460                | 0.3664<br>±0.2280                 | 0.268 #        | 0.3661<br>±0.1209                | 0.3335<br>±0.1318                 | 0.182 #        |
| 11-HEPE                    | 0.2752<br>±0.0907                | 0.2531<br>±0.1150                 | 0.616          | 0.2520<br>±0.0448                | 0.2364<br>±0.0928                 | 0.099 #        |
| 12-HEPE                    | 0.5039<br>±0.1762                | 0.4619<br>±0.2576                 | 0.268 #        | <b>0.5213</b><br><b>±0.1704</b>  | <b>0.4038</b><br><b>±0.1731</b>   | <b>0.001</b>   |
| 15-HEPE                    | 0.3150<br>±0.1086                | 0.2890<br>±0.1524                 | 0.356 #        | 0.3142<br>±0.0634                | 0.2596<br>±0.1144                 | 0.061          |
| 18-HEPE                    | 0.8580<br>±0.2946                | 0.7714<br>±0.3717                 | 0.325 #        | 0.8418<br>±0.2239                | 0.7502<br>±0.4476                 | 0.117 #        |
| 9-HODE                     | <b>22.0631</b><br><b>±7.3185</b> | <b>36.2855</b><br><b>±21.5709</b> | <b>0.019 #</b> | <b>17.1239</b><br><b>±6.0628</b> | <b>34.0942</b><br><b>±21.6186</b> | <b>0.015 #</b> |
| 13-HODE                    | <b>17.7783</b><br><b>±6.0021</b> | <b>25.0606</b><br><b>±10.8578</b> | <b>0.016 #</b> | <b>13.5081</b><br><b>±4.2496</b> | <b>25.1650</b><br><b>±13.2212</b> | <b>0.006 #</b> |
| CYP ω/(ω-1)<br>metabolites |                                  |                                   |                |                                  |                                   |                |
| 16-HETE                    | 0.2346<br>±0.0507                | 0.2194<br>±0.0562                 | 0.505          | 0.2175<br>±0.0583                | 0.2184<br>±0.0828                 | 0.695 #        |
| 17-HETE                    | 0.0565<br>±0.0112                | 0.0602<br>±0.0182                 | 0.951 #        | 0.0560<br>±0.0145                | 0.0517<br>±0.0147                 | 0.198          |
| 18-HETE                    | 0.1620<br>±0.0463                | 0.1651<br>±0.0450                 | 0.758 #        | 0.1499<br>±0.0282                | 0.1493<br>±0.0421                 | 0.952          |
| 19-HETE                    | 0.1441<br>±0.0810                | 0.1599<br>±0.0533                 | 0.585          | 0.1354<br>±0.0411                | 0.1662<br>±0.0571                 | 0.103          |
| 20-HETE                    | 0.4738<br>±0.2011                | 0.4803<br>±0.1680                 | 0.934          | 0.3992<br>±0.2211                | 0.4787<br>±0.2014                 | 0.138          |
| 22-HDHA                    | 0.0994<br>±0.0832                | 0.1067<br>±0.0758                 | 0.58 #         | <b>0.0763</b><br><b>±0.0603</b>  | <b>0.1115</b><br><b>±0.0824</b>   | <b>0.028 #</b> |
| 20-HEPE                    | 0.1460<br>±0.0808                | 0.1550<br>±0.0963                 | 0.81           | 0.1343<br>±0.0692                | 0.1485<br>±0.0768                 | 0.413          |

Notes: Mean±SD. Panel A: Arterial blood. Panel B: Venous blood.

**Table S3. Effects of hemodialysis on total plasma oxylipins and their ratios in venous blood of the CKD patients before (Pre-HD) and at cessation (Post-HD) of hemodialysis (n=12 each)**

| <b>Amount ng/ml</b>                                                                                   | <b>pre-HD Venous</b>  | <b>post-HD Venous</b> | <b>p value, t test<br/>(# paired<br/>Wilcoxon test)</b> |
|-------------------------------------------------------------------------------------------------------|-----------------------|-----------------------|---------------------------------------------------------|
| 5,6-EET + 5,6-DHET                                                                                    | 17.8740<br>±15.3357   | 63.1169 ±21.0481      | 0.002 #                                                 |
| 8,9-EET + 8,9-DHET                                                                                    | 8.8769 ±6.7288        | 23.6504 ±7.8856       | 0.002 #                                                 |
| 11,12-EET + 11,12-DHET                                                                                | 7.4546 ±6.8226        | 26.1620 ±9.1754       | 0.002 #                                                 |
| 14,15-EET + 14,15-DHET                                                                                | 10.0376 ±9.5061       | 36.1083 ±13.6146      | 0.002 #                                                 |
| 7,8-EDP + 7,8-DiHDPA                                                                                  | 3.7040 ±3.1733        | 10.8874 ±3.5963       | 0.002 #                                                 |
| 10,11-EDP + 10,11-DiHDPA                                                                              | 3.4580 ±3.0889        | 12.0623 ±3.9527       | 0.002 #                                                 |
| 13,14-EDP + 13,14-DiHDPA                                                                              | 2.7467 ±2.8205        | 7.9218 ±2.6423        | 0.002 #                                                 |
| 16,17-EDP + 16,17-DiHDPA                                                                              | 2.2873 ±2.0344        | 5.6394 ±2.0354        | 0.002 #                                                 |
| 19,20-EDP + 19,20-DiHDPA                                                                              | 4.7947 ±3.1021        | 17.2258 ±6.4814       | 0.002 #                                                 |
| 5,6-EEQ + 5,6-DiHETE                                                                                  | 1.3729 ±0.7133        | 1.7043 ±0.8338        | <0,001                                                  |
| 8,9-EEQ + 8,9-DiHETE                                                                                  | 1.0880 ±0.6966        | 4.4861 ±1.6000        | <0,001                                                  |
| 11,12-EEQ + 11,12-DiHETE                                                                              | 0.7552 ±0.4846        | 3.5323 ±1.3814        | 0.002 #                                                 |
| 14,15-EEQ + 14,15-DiHETE                                                                              | 0.7508 ±0.4514        | 3.3214 ±1.3339        | 0.002 #                                                 |
| 17,18-EEQ + 17,18-DiHETE                                                                              | 1.6056 ±0.8496        | 6.5059 ±2.3420        | 0.002 #                                                 |
| 9,10-EpOME + 9,10-DiHOME                                                                              | 25.8981<br>±13.6496   | 99.2342 ±38.1881      | 0.002 #                                                 |
| 12,13-EpOME + 12,13-DiHOME                                                                            | 24.5992<br>±12.1650   | 86.6564 ±25.6785      | 0.002 #                                                 |
| 5,6-DHET/5,6-EET                                                                                      | 0.0864 ±0.0565        | 0.0222 ±0.0120        | 0.002 #                                                 |
| 8,9-DHET/8,9-EET                                                                                      | 0.2858 ±0.2519        | 0.0599 ±0.0480        | 0.002 #                                                 |
| 11,12-DHET/11,12-EET                                                                                  | 0.0874 ±0.0650        | 0.0198 ±0.0099        | 0.002 #                                                 |
| 14,15-DHET/14,15-EET                                                                                  | 0.0550 ±0.0284        | 0.0127 ±0.0047        | 0.002 #                                                 |
| 7,8-DiHDPA/7,8-EDP                                                                                    | 0.5745 ±1.4719        | 0.0458 ±0.0285        | 0.002 #                                                 |
| 10,11-DiHDPA/10,11-EDP                                                                                | 0.0514 ±0.0285        | 0.0110 ±0.0041        | 0.002 #                                                 |
| 13,14-DiHDPA/13,14-EDP                                                                                | 0.0484 ±0.0269        | 0.0134 ±0.0039        | 0.002 #                                                 |
| 16,17-DiHDPA/16,17-EDP                                                                                | 0.0601 ±0.0343        | 0.0194 ±0.0071        | 0.003 #                                                 |
| 19,20-DiHDPA/19,20-EDP                                                                                | 0.2905 ±0.1983        | 0.0580 ±0.0264        | 0.002 #                                                 |
| 5,6-DiHETE/5,6-EEQ                                                                                    | 599.0058<br>±431.5977 | 121.8920<br>±63.0904  | 0.002 #                                                 |
| 8,9-DiHETE/8,9-EEQ                                                                                    | 0.1332 ±0.0872        | 0.0229 ±0.0107        | 0.002 #                                                 |
| 11,12-DiHETE/11,12-EEQ                                                                                | 0.0634 ±0.0260        | 0.0112 ±0.0032        | 0.002 #                                                 |
| 14,15-DiHETE/14,15-EEQ                                                                                | 0.0817 ±0.0318        | 0.0153 ±0.0044        | 0.002 #                                                 |
| 17,18-DiHETE/17,18-EEQ                                                                                | 0.2159 ±0.1591        | 0.0397 ±0.0133        | 0.002 #                                                 |
| 9,10-DiHOME/9,10-EpOME                                                                                | 0.1731 ±0.1090        | 0.0617 ±0.0222        | 0.003 #                                                 |
| 12,13-DiHOME/12,13-EpOME                                                                              | 0.2087 ±0.0951        | 0.0877 ±0.0327        | 0.003 #                                                 |
| Ratio<br>(5,6-DHET+8,9-DHET+11,12-DHET+14,15-DHET)<br>/<br>(5,6-EET+8,9-EET +11,12 EET<br>+14,15-EET) | 0.1188 ±0.0946        | 0.0253 ±0.0143        | 0.002 #                                                 |

|                                                                                                                                                     |                       |                       |                |
|-----------------------------------------------------------------------------------------------------------------------------------------------------|-----------------------|-----------------------|----------------|
| Ratio<br>(7,8-DiHDPA+10,11-DiHDPA<br>+13,14-DiHDPA+16,17-<br>DiHDPA+19,20-DiHDPA)<br>/<br>(7,8-EDP+10,11-EDP+13,14-<br>EDP+16,17-EDP+19,20-EDP)     | <b>0.1478 ±0.1106</b> | <b>0.0336 ±0.0143</b> | <b>0.002 #</b> |
| Ratio<br>(5,6-DiHETE+8,9-<br>DiHETE+11,12-<br>DiHETE+14,15-<br>DiHETE+17,18-DiHETE)<br>/<br>(5,6-EEQ+<br>8,9-EEQ+11,12-EEQ+14,15-<br>EEQ+17,18-EEQ) | <b>0.6335 ±0.4128</b> | <b>0.1315 ±0.0660</b> | <b>0.002 #</b> |
| Ratio<br>(9,10-DiHOME+12,13-<br>DiHOME)<br>/<br>(9,10-EpOME+12,13-EpOME)                                                                            | <b>0.1904 ±0.1007</b> | <b>0.0741 ±0.0258</b> | <b>0.003 #</b> |

---

Notes: Mean+SD
